# Supplementary material for: Centrosymmetric TiS as a novel topological electronic material with coexisting type-I, type-II and hybrid nodal line states
Source: Royal Society of Chemistry journal article supplement (doi:10.1039/d0tc03600e), 2020-01-01
Supplement: d0tc03600e1.pdf [file d0tc03600e1.pdf]

*Supplementary Information for*

Centrosymmetric TiS as a novel topological electronic material  
with coexisting type-I, type-II and hybrid nodal line states

Long Xu,<sup>a</sup> Xiaoming Zhang,<sup>\*a</sup> Weizhen Meng,<sup>a</sup> Tingli He,<sup>a</sup> Ying Liu,<sup>a</sup> Xuefang Dai,<sup>a</sup>  
Ying Zhang<sup>\*b</sup> and Guodong Liu<sup>\*a</sup>

<sup>a</sup>School of Materials Science and Engineering, Hebei University of Technology, Tianjin 300130, China.

<sup>b</sup>Physics Department, Beijing Normal University, Beijing 100875, China.

E-mail for corresponding authors: zhangxiaoming87@hebut.edu.cn; yingzhang@bnu.edu.cn;  
gdliu1978@126.com

## I. Band Structures of TiS under Different U Values

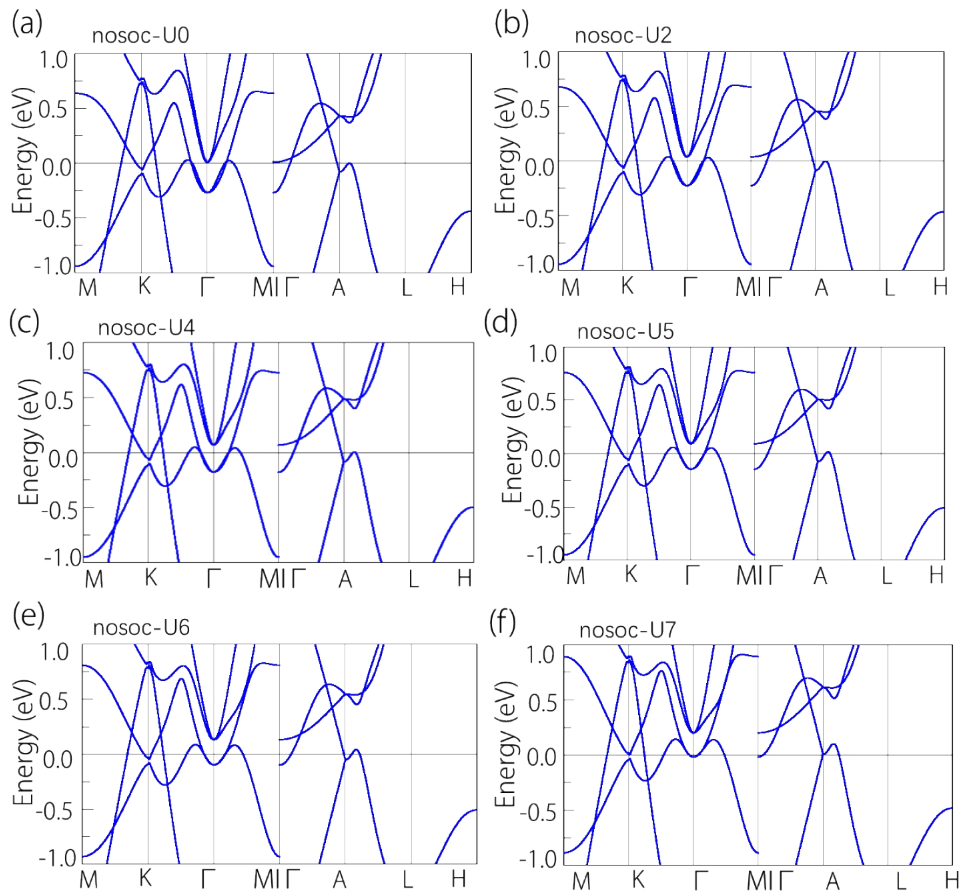

Figure S1. The band structures of TiS when the U values are chosen as (a) 0, (b) 2, (c) 4, (d) 5, (e) 6 and (f) 7 eV.
